# Supplementary material for: Transcriptional control of anthocyanin biosynthetic genes in extreme phenotypes for berry pigmentation of naturally occurring grapevines
Source: PubMed Central journal article supplement (PMC2147006; doi:10.1186/1471-2229-7-46), 2007-08-30
Supplement: 1471-2229-7-46-S1.pdf [file 1471-2229-7-46-S1.pdf]

**Additional file 1 - Phenology of the nine cultivars used in this study over the ripening period**

| Cultivar       | Pre-vèraison |       |      |         |        | 50% vèraison |       |      |         |        | 100% vèraison |       |      |         |        | harvest |       |      |         |        |
|----------------|--------------|-------|------|---------|--------|--------------|-------|------|---------|--------|---------------|-------|------|---------|--------|---------|-------|------|---------|--------|
|                | Weight       | °Brix | pH   | Acidity | Date   | Weight       | °Brix | pH   | Acidity | Date   | Weight        | °Brix | pH   | Acidity | Date   | Weight  | °Brix | pH   | Acidity | Date   |
| Moscato rosa   | 0.92         | 7.2   | 2.29 | 33.5    | 26-Jul | 1.99         | 8.2   | 2.35 | 29.5    | 29-Jul | 2.74          | 13.6  | 2.90 | 11.8    | 12-Aug | 2.76    | 19.2  | 3.23 | 7.5     | 05-Sep |
| Pinot gris     | 0.85         | 4.8   | 2.35 | 39.7    | 26-Jul | 1.11         | 10.4  | 2.72 | 24.9    | 01-Aug | 1.35          | 16.6  | 3.10 | 9.2     | 18-Aug | 1.57    | 17.4  | 3.27 | 7.9     | 05-Sep |
| Pinot Noir     | 0.89         | 3.8   | 2.33 | 41.1    | 26-Jul | 1.02         | 7.4   | 2.65 | 27.2    | 01-Aug | 1.35          | 13.2  | 2.98 | 11.8    | 12-Aug | 1.67    | 18.2  | 3.40 | 6.0     | 05-Sep |
| Gewurztraminer | 1.32         | 3.8   | 2.55 | 36.7    | 26-Jul | 1.19         | 5.2   | 2.80 | 26.8    | 01-Aug | 0.77          | 12.8  | 3.12 | 11.6    | 18-Aug | 1.91    | 16.4  | 3.46 | 5.5     | 05-Sep |
| Tempranillo    | 1.15         | 4.2   | 2.35 | 40.4    | 26-Jul | 1.40         | 9.0   | 2.73 | 26.8    | 01-Aug | 1.87          | 12.2  | 2.94 | 12.9    | 12-Aug | 2.50    | 17.2  | 3.35 | 6.8     | 15-Sep |
| Sauvignonasse  | 0.66         | 3.4   | 2.33 | 28.9    | 26-Jul | 1.02         | 6.2   | 2.57 | 32.1    | 08-Aug | 1.27          | 11.2  | 2.83 | 14.7    | 17-Aug | 1.31    | 16.8  | 3.37 | 7.1     | 15-Sep |
| Grignolino     | 0.93         | 3.0   | 2.38 | 32.5    | 26-Jul | 1.18         | 8.6   | 2.66 | 25.8    | 12-Aug | 1.68          | 16.0  | 3.01 | 10.8    | 02-Sep | 1.72    | 17.4  | 3.25 | 7.6     | 15-Sep |
| Aglianico      | 0.87         | 3.2   | 2.34 | 34.9    | 26-Jul | 1.82         | 8.0   | 2.49 | 35.3    | 18-Aug | 2.32          | 13.0  | 2.72 | 18.1    | 02-Sep | 2.38    | 15.9  | 2.98 | 9.5     | 04-Oct |
| Nebbiolo       | 1.26         | 3.4   | 2.26 | 38.3    | 26-Jul | 1.62         | 9.8   | 2.62 | 29.4    | 18-Aug | 2.11          | 13.6  | 2.85 | 15.1    | 02-Sep | 2.35    | 18.0  | 3.12 | 8.7     | 04-Oct |
